# Supplementary material for: Publication practices and standards: recommendations from GSK Vaccines’ author survey
Source: PubMed Central journal article supplement (PMC4247206; doi:10.1186/1745-6215-15-446), 2014-11-18
Supplement: 13063_2014_2308_MOESM1_ESM.pdf [file 13063_2014_2308_MOESM1_ESM.pdf]

# AUTHORSHIP QUESTIONNAIRE

## Section 1.

### Identifying information

NAME:

FUNCTION:

ACADEMIC DEGREE(S):

CONTACT DETAILS:

AFFILIATION\*:

DEPARTMENT:

POSTAL ADDRESS:

ZIP/POSTAL CODE:

CITY:

COUNTRY: Please choose as appropriate

TELEPHONE:

FAX:

\* For GSK in-/out-sourced contractors, please indicate your CRO/freelance affiliations

1. Your role in the study: Please choose as appropriate

### Proposed Publication Plan

#### ICMJE : CRITERIA FOR AUTHORSHIP

An author is an individual who has made substantial intellectual contributions to a publication and should have participated sufficiently in the work to meet all of the following ICMJE criteria (ICMJE; <http://www.icmje.org>):

1. Substantial contributions to conception and design, acquisition of data, or analysis and interpretation of data
2. Drafting the article or revising it critically for important intellectual content
3. Final approval of the version to be published
4. Agreement to be accountable for all aspects of the work in ensuring that questions related to the accuracy or integrity of any part of the work are appropriately investigated and resolved.

**Section 2.**

**Authorship**

|                                                                                                                                | YES                   | NO                    |
|--------------------------------------------------------------------------------------------------------------------------------|-----------------------|-----------------------|
| 2. Are you interested in taking an active role as an author?                                                                   | <input type="radio"/> | <input type="radio"/> |
| 3. If yes, to which publication(s) of the proposed publication plan?                                                           |                       |                       |
| 4. Would you like to be a member of the writing committee? (if applicable)                                                     | <input type="radio"/> | <input type="radio"/> |
| 5. Would you like to be lead author?                                                                                           | <input type="radio"/> | <input type="radio"/> |
| 6. If you DO NOT wish to be an author, would you like your contribution to this project to be acknowledged in the publication? | <input type="radio"/> | <input type="radio"/> |

**WRITING COMMITTEE**

The writing committee includes a group of authors who commit to take the lead on the publication’s development. The lead author and the publication writing committee are responsible for providing proposals for implementation of comments and for resolving potential conflicting feedbacks from authors. For transparency reasons, it is increasingly common practice to disclose the writing committee membership in the publication.

**AUTHORSHIP DEFINITIONS**

**Lead author:** The lead author takes the lead for writing and managing the article (GGP2; <http://www.gpp-guidelines.org/>)

**Corresponding author:** The corresponding author functions as the primary contact between the journal and the other authors. The corresponding author does not need to be the lead author, but should be selected for his/her ability to help co-ordinate the review and revision process (MPIP; [http://www.ismpp.org/initiatives/Files/MPIP\\_Authors\\_Submission\\_Toolkit.pdf](http://www.ismpp.org/initiatives/Files/MPIP_Authors_Submission_Toolkit.pdf)).

**Section 3.**

**Your expertise**

7. Please detail your relevant expertise regarding the content of the publications (to give a better insight into your expertise and publication background, please feel free to provide a current copy of your CV in English)

**RESPONSIBILITIES OF AUTHORS**

The scientific publications group at GSK can provide support for developing the publication, however, it is the specific responsibility of the authors to have an active role in all of the following: (GGP2; <http://www.gpp-guidelines.org/>)

- Collaborate in the development of the manuscript outline
- Critically review and comment on successive drafts
- Approve the final draft before submission and any revisions resulting from editorial comments

Please note that according to the guidelines on Good Publication Practice (GPP2), “no honorariums are paid for authorship of peer reviewed articles or presentations”.

Investigators/experts not willing to be authors will have a chance to be acknowledged in the publication.

## Section 4.

## Congress presentation

8. Are you interested in being a presenting author of the results at a scientific congress? (if applicable)

YES NO

 

A presenting author should meet the qualifications for authorship. On top of these, it is preferred that the person has good presentation skills and is fluent in the language of the presentation.

## Section 5.

## Publication writing

9. Are you interested in writing the publication?

YES

NO

Would you need the support of a medical writer?

## SUPPORT FOR AUTHORS

Authors must contribute to the writing/content development of the publication and are responsible for content. Although GSK can provide writing support\*, authors are welcome to draft the manuscript themselves and implement the comments of all authors received during review according the GSK processes. The GSK scientific publication group will ensure the drafts are circulated to all authors and sponsor reviewers and comments are provided to authors for implementation.

\*Writing support: is the technical writing support provided by a professional medical writer. Professional medical writers should ensure that authors control and direct writing. Particular care is taken to ensure appropriate acknowledgement of the contributions made by medical writers and to describe their funding (ICMJE; <http://www.icmje.org>).  
(Section taken literally from ICMJE)

**Section 6.**

**Your contribution to study**

10. Please indicate in the table below your contributions to the study. These will help to determine eligibility for authorship or acknowledgement, according to the ICMJE criteria

| <b>Contribution to Study</b>                               | <b>YES</b>            | <b>NO</b>             | <b>Comment (if applicable)</b> |
|------------------------------------------------------------|-----------------------|-----------------------|--------------------------------|
| Conception/design/planning of the study                    | <input type="radio"/> | <input type="radio"/> |                                |
| Acquisition/assembling of data                             | <input type="radio"/> | <input type="radio"/> |                                |
| Contribution to:                                           |                       |                       |                                |
| Center coordination                                        | <input type="radio"/> | <input type="radio"/> |                                |
| Data extraction                                            | <input type="radio"/> | <input type="radio"/> |                                |
| Quality check                                              | <input type="radio"/> | <input type="radio"/> |                                |
| Performing or supervising the analysis                     | <input type="radio"/> | <input type="radio"/> |                                |
| Interpretation of results                                  | <input type="radio"/> | <input type="radio"/> |                                |
| Provision of study materials or subjects                   | <input type="radio"/> | <input type="radio"/> |                                |
| Provision of statistical expertise                         | <input type="radio"/> | <input type="radio"/> |                                |
| Collection of Data                                         | <input type="radio"/> | <input type="radio"/> |                                |
| Acquisition of funding                                     | <input type="radio"/> | <input type="radio"/> |                                |
| Choice/recruitment of centers/recruitment of investigators | <input type="radio"/> | <input type="radio"/> |                                |
| Administrative, technical or logistic support              | <input type="radio"/> | <input type="radio"/> |                                |
| Laboratory/serology testing                                | <input type="radio"/> | <input type="radio"/> |                                |
| Supervision of the study/research group                    | <input type="radio"/> | <input type="radio"/> |                                |
| Other (please specify):                                    | <input type="radio"/> | <input type="radio"/> |                                |

**AGREEMENT**

I agree that my responses to this questionnaire will be used by GlaxoSmithKline Biologicals SA and its affiliated companies for the purpose of planning, preparing and publishing scientific publications arising out of the Study and will be archived for documentation purposes in GlaxoSmithKline Biologicals SA repository.
